# Supplementary material
Source: PubMed Central journal article supplement (PMC8045494)
Supplement: advancesADV2020003717-suppl1.pdf [file advancesADV2020003717-suppl1.pdf]

## SUPPLEMENTAL APPENDIX

**Table S1.** Univariate and multivariate Cox model for overall survival

| Clinical characteristic                                  | Univariate analysis   |       | Multivariate analysis |        |
|----------------------------------------------------------|-----------------------|-------|-----------------------|--------|
|                                                          | Hazard ratio (95% CI) | p     | Hazard ratio (95% CI) | p      |
| Age                                                      | 1.01(0.96,1.06)       | 0.758 |                       |        |
| Bone marrow blast percentage                             | 0.99(0.98,1.01)       | 0.364 |                       |        |
| ECOG PS 0-1 vs 2-3                                       | 1.47(0.79,2.71)       | 0.220 |                       |        |
| ELN adverse vs intermediate risk cytogenetics            | 3.12(1.74,5.59)       | 0.000 |                       |        |
| <i>NPM1</i> <sup>mut</sup> vs wild type                  | 0.27(0.11,0.63)       | 0.002 |                       |        |
| <i>FLT3</i> -ITD/ <i>TKD</i> <sup>mut</sup> vs wild type | 0.30 (0.09,0.98)      | 0.045 |                       |        |
| <i>RUNX1</i> <sup>mut</sup> vs wild type                 | 1.05(0.51,2.17)       | 0.894 |                       |        |
| <i>ASXL1</i> <sup>mut</sup> vs wild type                 | 0.93(0.42,2.08)       | 0.858 |                       |        |
| <i>TP53</i> <sup>mut</sup> vs wild type                  | 6.11(3.25,11.49)      | 0.000 | 3.90 (1.62,9.42)      | 0.0025 |
| <i>IDH1/2</i> <sup>mut</sup> vs wild type                | 0.20 (0.07,0.57)      | 0.002 | 0.09 (0.02,0.40)      | 0.0017 |
| <i>N/KRAS</i> <sup>mut</sup> vs wild type                | 1.22(0.65,2.32)       | 0.536 |                       |        |
| Response: CR/CRi vs MLFS                                 | 0.42(0.21,0.84)       | 0.014 | 0.26 (0.09,0.74)      | 0.0112 |
| MRD at 2-month, positive vs negative                     | 4.97(2.14,11.57)      | 0.000 | 3.81 (1.48,9.81)      | 0.0055 |
| HSCT vs no HSCT (as a time-dependent variable)           | 0.35 (0.12, 0.97)     | 0.045 |                       |        |
| Newly diagnosed AML vs. untreated sAML                   | 0.31 (0.15,0.66)      | 0.003 |                       |        |
| Treated sAML vs. untreated sAML                          | 0.40 (0.16,0.99)      | 0.049 |                       |        |

ECOG = Eastern Co-operative Oncology Group, ELN = European LeukemiaNet 2017, CR = complete response, CRi = CR with incomplete hematologic recovery, MLFS = morphologic leukemia-free state, MRD = measurable residual disease by flow cytometry, HSCT = allogeneic stem-cell transplantation, sAML = secondary AML, treated sAML = secondary AML with prior therapy for antecedent hematological disorder but not for AML.

**Table S2.** Univariate and multivariate Fine-Gray model for relapse-free survival censored at allogeneic stem-cell transplantation

| Clinical characteristic                          | Univariate analysis   |        | Multivariate analysis |         |
|--------------------------------------------------|-----------------------|--------|-----------------------|---------|
|                                                  | Hazard ratio (95% CI) | p      | Hazard ratio (95% CI) | p       |
| Age                                              | 0.98 (0.93,1.04)      | 0.49   |                       |         |
| Bone marrow blast percentage                     | 1.00 (0.98, 1.02)     | 0.93   |                       |         |
| ECOG PS 0-1 vs 2,3                               | 0.77 (0.34, 1.78)     | 0.55   |                       |         |
| ELN adverse vs intermediate risk cytogenetics    | 3.90 (1.83,8.29)      | 0.0004 |                       |         |
| <i>NPM1</i> <sup>mut</sup> vs wild-type          | 0.20 (0.06,0.67)      | 0.009  |                       |         |
| <i>FLT3</i> -ITD/TKD <sup>mut</sup> vs wild type | 0.31 (0.07,1.38)      | 0.12   |                       |         |
| <i>RUNX1</i> <sup>mut</sup> vs wild type         | 0.92 (0.40,2.13)      | 0.85   |                       |         |
| <i>ASXL1</i> <sup>mut</sup> vs wild type         | 0.88 (0.34, 2.23)     | 0.78   |                       |         |
| <i>TP53</i> <sup>mut</sup> vs wild type          | 4.91 (2.33,10.30)     | <0.001 | 78.98 (13.04, 478.53) | <0.0001 |
| <i>IDH1/2</i> <sup>mut</sup> vs wild type        | 0.46 (0.16,1.33)      | 0.15   |                       |         |
| <i>N/KRAS</i> <sup>mut</sup> vs wild type        | 2.13 (1.00,4.51)      | 0.05   |                       |         |
| MRD at 2-month, positive vs negative             | 2.44 (0.91,6.56)      | 0.077  | 1.73 (0.66, 4.57)     | 0.27    |
| Newly diagnosed AML vs. untreated sAML           | 0.49 (0.16,1.45)      | 0.20   |                       |         |
| Treated sAML vs. untreated sAML                  | 0.61 (0.17,2.15)      | 0.44   |                       |         |

ECOG = Eastern Co-operative Oncology Group, ELN = European LeukemiaNet 2017, CR = complete response, CRi = CR with incomplete hematologic recovery, MLFS = morphologic leukemia-free state, MRD = measurable residual disease by flow cytometry, sAML = secondary AML, treated sAML = secondary AML with prior therapy for antecedent hematological disorder but not for AML.

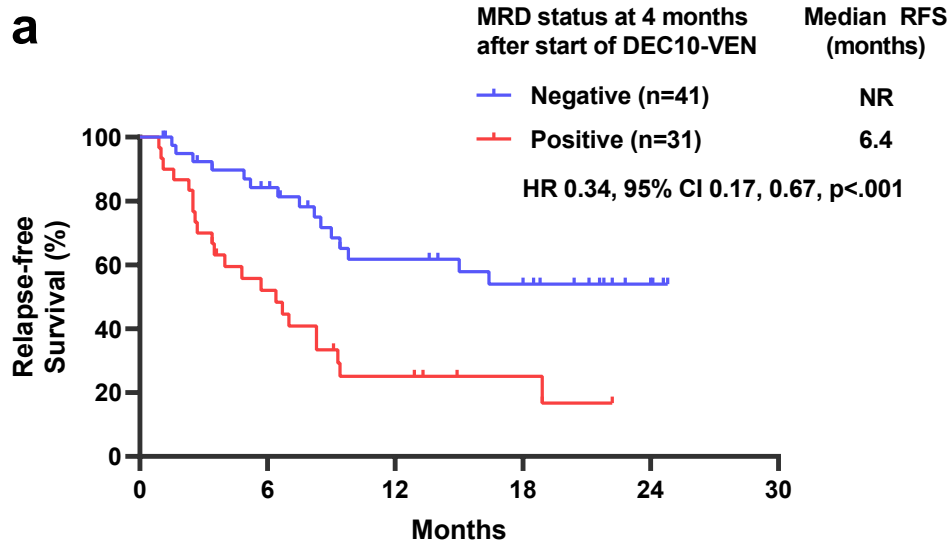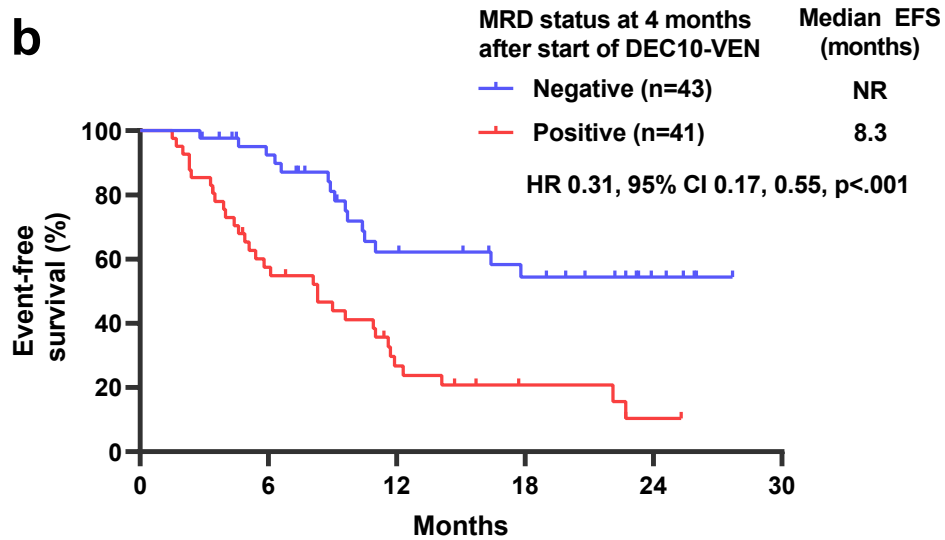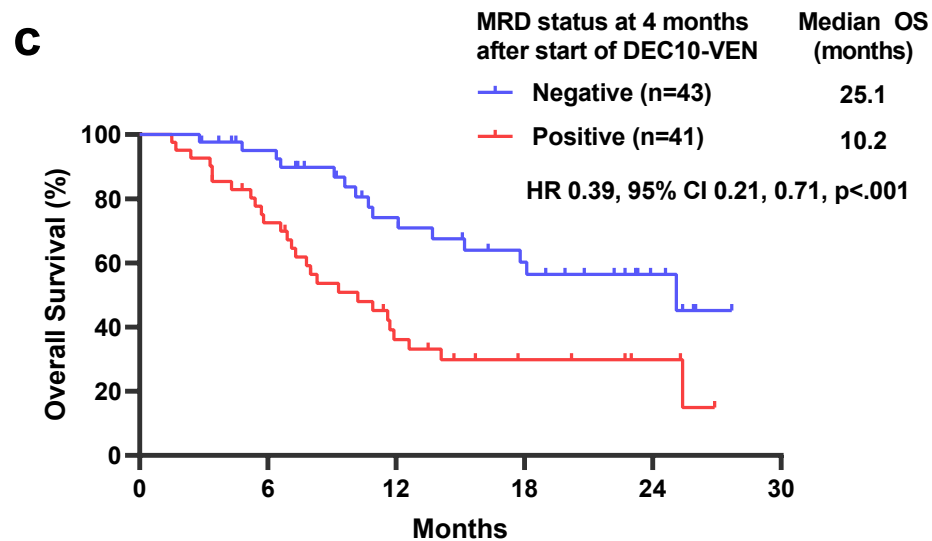

**Fig. S1.** Outcomes by measurable residual disease (MRD) status at 4 months after starting decitabine and venetoclax, **a.** relapse-free survival (RFS), **b.** event-free survival (EFS), and **c.** overall survival (OS).

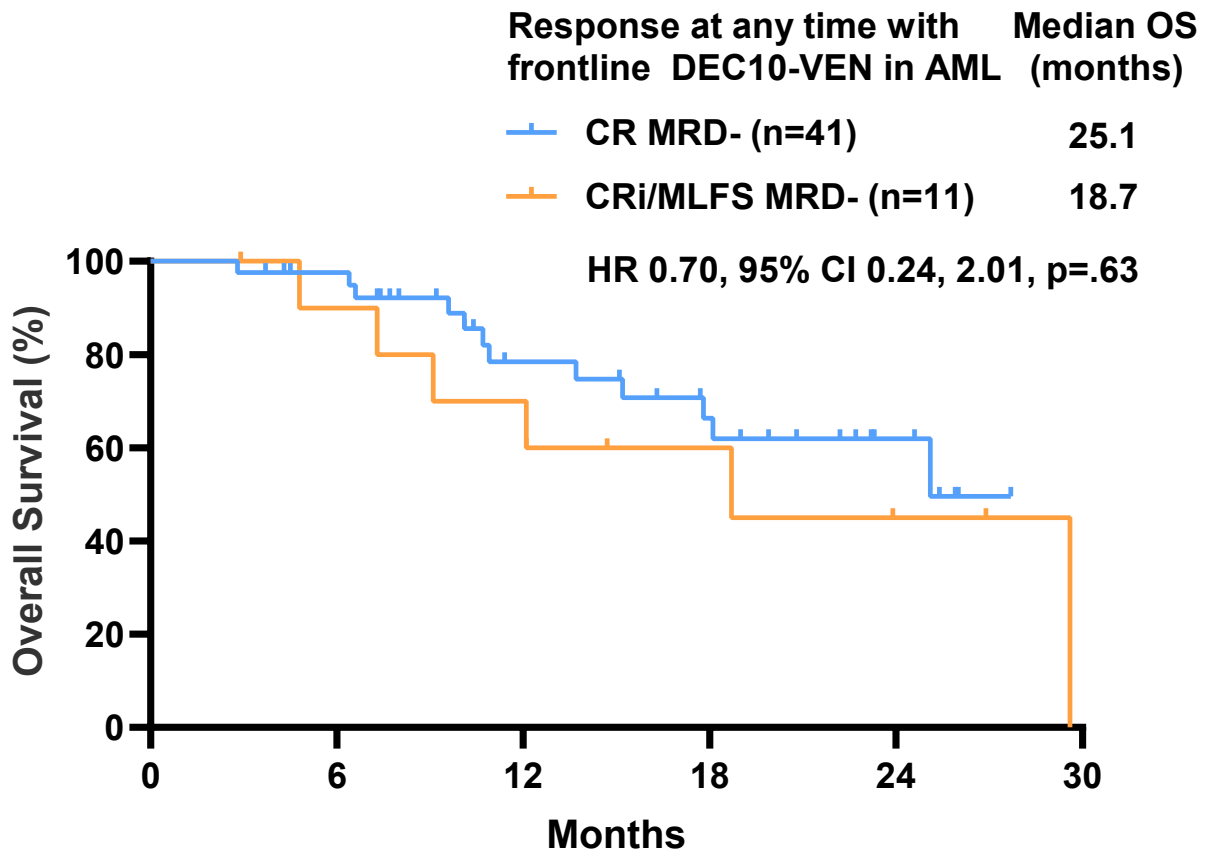

**Fig. S2.** Median overall survival (OS) of patients achieving negative measurable residual disease (MRD-) at any time by morphologic response status of complete remission (CR) vs. CR with incomplete hematologic recovery (CRi) or morphologic leukemia-free state (MLFS).

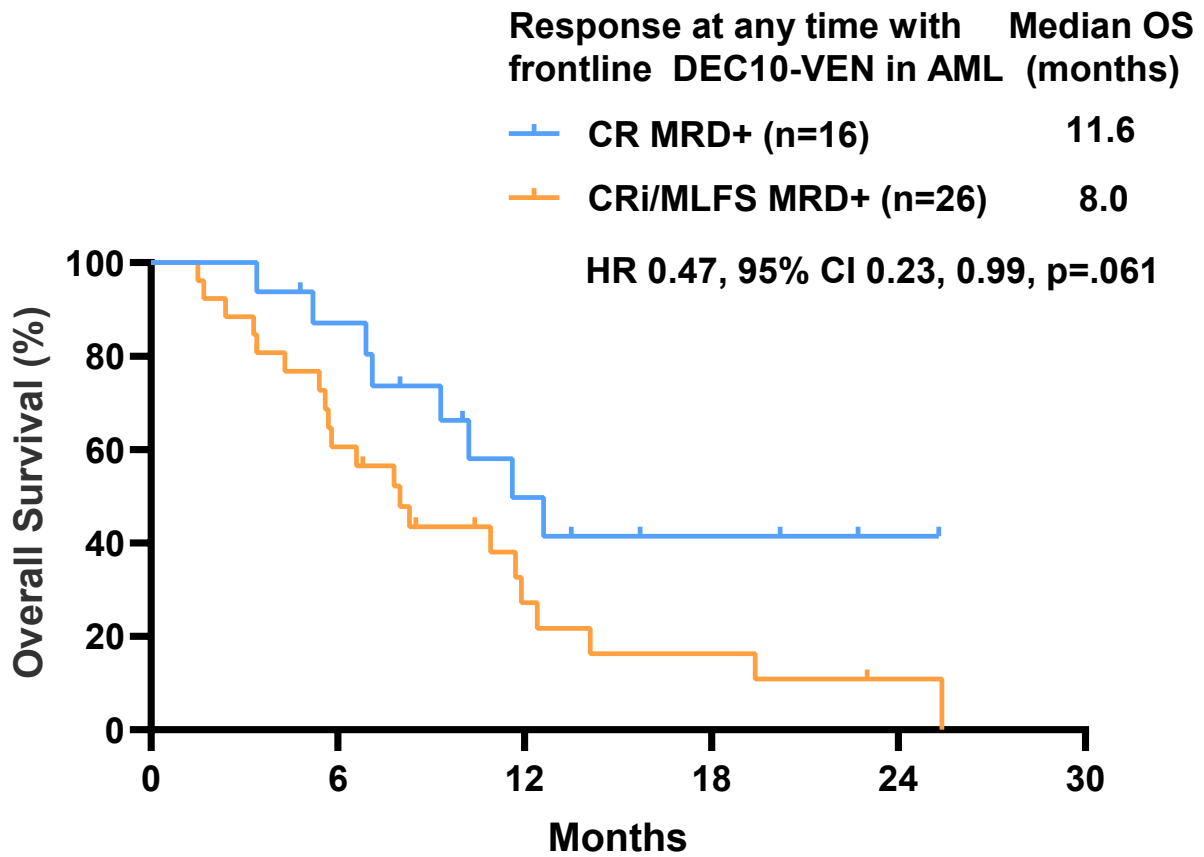

**Fig. S3.** Median overall survival (OS) of patients with persistent measurable residual disease (MRD+) by morphologic response status of complete remission (CR) vs. CR with incomplete hematologic recovery (CRi) or morphologic leukemia-free state (MLFS).
